# Supplementary material for: Early surgery versus initial conservative treatment in patients with spontaneous supratentorial lobar intracerebral haematomas (STICH II): a randomised trial
Source: PubMed Central journal article supplement — Lancet. 2013 Aug 3;382(9890):397–408. doi: 10.1016/S0140-6736(13)60986-1 (PMC3906609; doi:10.1016/s0140-6736(13)60986-1), 2013-08-03
Supplement: mmc1.pdf [file mmc1.pdf]

# THE LANCET

## Supplementary appendix

This appendix formed part of the original submission and has been peer reviewed. We post it as supplied by the authors.

Supplement to: Mendelow AD, Gregson BA, Rowan EN, Murray GD, Gholkar A, Mitchell PM, for the STICH II Investigators. Early surgery versus initial conservative treatment in patients with spontaneous supratentorial lobar intracerebral haematomas (STICH II): a randomised trial. *Lancet* 2013; published online May 29. [http://dx.doi.org/10.1016/S0140-6736\(13\)60986-1](http://dx.doi.org/10.1016/S0140-6736(13)60986-1).

**This online appendix has been corrected. The corrected version first appeared at [thelancet.com](http://thelancet.com) on Aug 2, 2013.**

## Appendix 1. Additional material for STICH II: causes of death, serious adverse events, investigators and recruitment by centre, measurement of Rankin

**Table A1. Causes of death**

|                                         | Early surgery patients<br>N = 54 | Initial conservative patients<br>N= 69 |
|-----------------------------------------|----------------------------------|----------------------------------------|
| Respiratory/Chest infection             | 13 (24%)                         | 20 (29%)                               |
| Pulmonary embolism/deep vein thrombosis | 2 (4%)                           | 9 (13%)                                |
| Cardiac                                 | 14 (26%)                         | 5 (7%)                                 |
| Neurological deterioration*             | 0 (0%)                           | 3 (4%)                                 |
| ICH (including rebleed)                 | 8 (15%)                          | 20 (29%)                               |
| Infection/sepsis*                       | 5 (2%)                           | 4 (1%)                                 |
| Multi-organ failure*                    | 2 (4%)                           | 4 (6%)                                 |
| Cancer and other*                       | 5 (9%)                           | 2 (3%)                                 |
| Unknown cause*                          | 5 (9%)                           | 1 (1%)                                 |

Notes: \* These categories (containing <10 observations in total) were combined in order to undertake a chi-squared test (p = 0.008)

**Table A2. Serious Adverse Events.**

There were 139 reported serious adverse events in 107 patients. Some patients experienced more than one event and some patients experienced more than one event in the same category.

| Event                                    | Analysis by event  |                      | Analysis by patient                      |                                                |
|------------------------------------------|--------------------|----------------------|------------------------------------------|------------------------------------------------|
|                                          | Early surgery      | Initial conservative | Early surgery patients<br>N = 298 (100%) | Initial conservative patients<br>N= 291 (100%) |
| <b>Number</b>                            | <b>N=64 (100%)</b> | <b>N=75 (100%)</b>   | <b>N=51 (17%)</b>                        | <b>N=56 (19%)</b>                              |
|                                          | % of events        | % of events          | % of all patients                        | % of all patients                              |
| Respiratory / Chest infection            | 8 (12%)            | 13 (17%)             | 8 (3%)                                   | 12 (4%)                                        |
| Pulmonary embolism /deep vein thrombosis | 3 (5%)             | 1 (1%)               | 3 (1%)                                   | 1 (-)                                          |
| Cardiac                                  | 4 (6%)             | 8 (11%)              | 4 (1%)                                   | 8 (3%)                                         |
| Neurological deterioration               | 9 (14%)            | 20 (27%)             | 9 (3%)                                   | 17 (6%)                                        |
| Seizures                                 | 10 (16%)           | 5 (7%)               | 10 (3%)                                  | 5 (2%)                                         |
| ICH (including rebleed)                  | 12 (19%)           | 18 (24%)             | 12 (4%)                                  | 18 (6%)                                        |
| Infection/sepsis                         | 5 (8%)             | 4 (5%)               | 5 (2%)                                   | 4 (1%)                                         |
| Multi-organ failure                      | 6 (9%)             | 5 (7%)               | 3 (1%)                                   | 5 (2%)                                         |
| Cancer and other                         | 7 (11%)            | 1 (1%)               | 7 (2%)                                   | 1 (-)                                          |

## List of Investigators by country and centre together with the number of patients recruited

(In this list centres that recorded zero patients did return at least one screening log)

Australia, Melbourne, Royal Melbourne Hospital (2) – S Davis, P Hand  
Austria, Vienna, Rudolfstiftung Wein (0) – G Kleinpeter;  
Canada, Edmonton, University of Alberta Hospital (0) – M Findlay  
China, Beijing, Beijing Tiantan Hospital (0) – Y Zhao  
China, Shanghai, Huashan Hospital (4) – Y Sin, J Hu  
Czech Republic, Ostrava, Faculty Hospital of Ostrava (0) – T Krejci, S Poticny  
Czech Republic, Prague, Charles University and Military University Hospital (10) – V Benes, O Bradac M Mohapl  
Czech Republic, Brno, University Hospital (9) – M Smrcka, V Juran, K Svoboda  
Czech Republic, Liberec, Liberec Regional Hospital (2) – P Buchvald, V Benes 3rd  
Egypt, Alexandria, Alexandria University Hospital (1) – O S Abdelaziz, I Zidan  
Egypt, Mansoura, Mansoura International Specialised Hospital (45) – A-E Shehab-Eldien, E M Kandil, H M Taher, M F El-Faresy  
Germany, Münster, Clemens Hospital (2) – A Sepehrnia  
Germany, Berlin, Helios Klinikum Berlin Buch (17) – J Kiwit, S Schreiber, F Youssef  
Germany, Erlangen, Universitätsklinikum Erlangen (6) – M Buchfelder, F Swozil  
Germany, Amberg, Hospital Klinikum Amberg (5) – A Kleindienst, M Marin, M Megele  
Germany, Düsseldorf, Medical Faculty, Heinrich-Heine-University (10) – D Hänggi, K Beseoglus  
Germany, Heidelberg, University Hospital Heidelberg (9) – K Kiening, B Orakcioglu, P Schiebel  
Germany, Münster, University Hospital Munster (6) – M Holling, H Wassmann  
Germany, Homburg-Saar, Saarland University Medical Centre (10) – K Schwerdtfeger, J Szczygielski  
Germany, Lübeck, University Schleswig-Holstein (3) – G Nowak, S Spuck  
Germany, Dessau, Neurochirurgische Klinik (9) – K Sadowy  
Germany, Greifswald, Greifswald University (2) – H W S Schroder, C Müller  
Germany, Wiesbaden, Dr. Horst Schmidt Kliniken GmbH (2) – G F Hamann, R Schönmayr  
Germany, Berlin, Charite – University Medicine Berlin (10) – E Juettler, J Woitzik H Neugebauer  
Germany, Jena, Universitätsklinikum Jena (2) – A Waschke, R Kalff  
Germany, Hamburg, Asklepios Klinik Altona (0) – Y Chehade  
Greece, Thessaloniki, Ippokration General Hospital (3) – P Tsitsopoulos  
Greece, Athens, Evangelismos Hospital (6) – G Stranjalis, L Stavrinou  
Hungary, Pecs, Pecs University Hospital (4) – A Buki, L Szapary  
Hungary, Borsod, Borsod County and University Teaching Hospital (9) – J Dobai  
India, Maharashtra, Acharya Vinoba Bhawe Rural Hospital (3) – A Agrawal, A Kakani  
India, Bangalore, BGS Global Hospitals (9) – S A V Rao, N K Venkataramana, A L Naik  
India, Ludhiana, Christian Medical College and Hospital (3) – S S Grewal, B Gupta  
India, Dhakuria, AMRI Hospitals (0) – R Bhattacharya  
India, Hyderabad, Care Hospitals (0) – T V R Murty  
India, Bangalore, National Institute of Mental Health and Neurosciences (1) – B Indira Devi, G Jagath Lal  
India, New Delhi, All India Institute of Medical Sciences (19) – P S Chandra, M Tripathi, B S Sharma  
India, Calcutta, National Neurosciences Centre (0) – K Sridhar, R Sengupta  
India, Trivandrum, Sree Chitra Tirunal Institute for Medical Sciences and Technology (4) – S Nair, G Menon  
India, Visakhapatnam, Care Hospital (3) – P V Ramana, P M Jagannath  
Israel, Haifa, Rambam Hospital (0) – L Levi, M Zaaroor  
Italy, Rome, University Hospital Sapienza (6) – R Delfini, A Pichierri  
Japan, Tokyo, Hospital NTT Medical Center Tokyo (3) – A Morita, T Kimura  
Latvia, Riga, Riga East University Hospital, Clinic ‘Gailezers’ (3) – K Auslands  
Latvia, Riga, Pauls Stradins Clinical University Hospital (29) – E Valeinis, R Mikijanskis  
Lithuania, Klaipeda, Klaipeda University Hospital (28) – A Gvazdaitis, K Jacikevicius, D Liutkus  
Republic of Macedonia, Skopje, University Neurosurgical Clinic Skopje (27) – K Lozance, A Chaparoski, I Pangovski  
Malaysia, Johor Bahru, Hospital Sultanah Aminah (3) – N Rahman  
Malaysia, Kubang Kerian, Hospital Universiti Sains Malaysia (1) – J M Abdullah, S K Sim  
Mexico, Mexico City, Instituto Nacional de Neurologia y Neurocirugia (6) – S Romero-Vargas, D Mendez-Rosito  
Mexico, Guadalajara, Hospital Civil de Guadalajara (0) – J Ruiz-Sandoval  
Nepal, Dharan, B. P. Koirala Institute of Health Sciences (9) – Y B Roka  
Nepal, Lalitpur, B & B Hospital (2) – K Sharma

Pakistan, Lahore, Lahore General Hospital (10) – K Mahmood, T Salahuddin  
 Pakistan, Peshawar, Northwest General Hospital and Research Centre (6) – M T Khan, F F Khan  
 Poland, Poznan, Karol Marcinkowski University of Medical Sciences (3) – S Nowak, B Sokol  
 Poland, Bialystok, Medical University Hospital (21) – P Szydlik, Z Mariak, J Kochanowicz  
 Romania, Cluj-Napoca, Cluj County Emergency Hospital (10) – I S Florian, P A Kiss  
 Romania, Timisoara, County Hospital (31) – H Ples, M A Angelescu, M S Hanas  
 Russia, Novosibirsk, Novosibirsk State Medical University (3) – A Krivoshapkin  
 Saudi Arabia, Riyadh, King Khalid University Hospital (0) - E Elgamal  
 Singapore, Singapore, National University Hospital (1) – D K S Choy, KJ Teo  
 South Africa, Pretoria, Steve Biko Academic Hospital (0) – S Mokgokong  
 Spain, Valladolid, Hospital Universitario Rio Hortega (3) – R S Sarabia, I A Reganon  
 Spain, Murcia, University Hospital Murcia (1) – M Galarza  
 Spain, Santander, University Hospital Marques de Valdecilla (12) – A Vazquez-Barquero, I Pinto Rafael  
 Spain, Bilbao, Cruces University Hospital (0) – J Garibi, I Pomposo,  
 Spain, Valladolid, Hospital Clinico Universitario (2) – R Sarabia  
 Spain, Palma de Mallorca, Son Espases University Hospital (1) – J Ibanez, E Gonzalez  
 Spain, Badalona-Barcelona, Germans Trias I Pujol Hospital (1) – C Dominguez, L Muñoz  
 Sri Lanka, National Hospital of Sri Lanka (25) – H S Kularathne, S D Perera, P Kamani  
 Turkey, Istanbul, Istanbul University Faculty of Medicine (3) – O Barlas, N Y Barlas  
 UK, Leeds, Leeds General Infirmary (2) – J Timothy, R Mathew  
 UK, Middlesbrough, James Cook University Hospital (1) – R Strachan, S Metcalfe  
 UK, Salford, Salford Royal (3) – A King, H Patel  
 UK, London, Atkinson Morley Department of Neurosurgery (10) – B A Bell, T L Jones  
 UK, Southampton, Southampton University Hospital (3) – D Bulters, A Belli, S Ross  
 UK, Dundee, Ninewells Hospital and Medical School (8) – S Eljamel, F Falcone  
 UK, Brighton, Hurstwood Park Neurosurgical Centre (1) – G Critchley  
 UK, Cambridge, Addenbrooke's Hospital (4) – P Kirkpatrick  
 UK, Newcastle, Royal Victoria Infirmary (45) – J Crossman, A D Mendelow, P Mitchell, N Ross, P Bhattathiri, S Metcalfe, D Holliman  
 UK, Aberdeen, Aberdeen Royal Infirmary (1) – P Bhatt, M Kamel  
 UK, Liverpool, The Walton Centre (0) – P Eldridge  
 UK, Preston, Lancashire Teaching Hospital NHS Trust (2) – N Gurusinghe, N Kumarasinghe  
 UK, Edinburgh, Western General Hospital (3) – R A Salman, I Whittle  
 USA, Hartford, Hartford Hospital (19) – I Kureshi, L Hosig  
 USA, Philadelphia, Temple University Hospital (10) – M Weaver, F Sultan, D Laske, P Connolly  
 USA, St. Louis, Washington University School of Medicine (0) – G Zipfel  
 USA, Albany, Albany Medical Centre (0) – J German  
 USA, Chicago, Loyola University Hospital (0) – M Schneck, C Loftus  
 USA, Hershey, Penn State Hershey Medical Centre (1) – K M Cockcroft  
 USA, Jacksonville, Mayo Clinic (1) – B H Eidelman, J F Meschia  
 USA, Chicago, University of Illinois Hospital and Health Sciences System (3) – S Amin-Hanjani, K Slavin

## Version of Rankin used in STICH and STICH II

As a result of your brain haemorrhage, how would you rate your general health?

(Please tick the *one* box which seems most appropriate to you)

I am perfectly fit and well

I have a few minor problems but they do not affect my lifestyle

I can do all everyday activities, but my lifestyle is restricted

My lifestyle is very restricted. I need some help with everyday activities

My lifestyle is very restricted. I need a lot of help but not constant attention

I am totally dependent and need 24 hour care

|                          |
|--------------------------|
| <input type="checkbox"/> |
| <input type="checkbox"/> |
